# Supplementary material for: MysiRNA-Designer: A Workflow for Efficient siRNA Design
Source: PubMed Central journal article supplement (PMC3202522; doi:10.1371/journal.pone.0025642), 2011-10-26
Supplement: pone.0025642.s001.pdf [file pone.0025642.s001.pdf]

**Blast and RNAs parameters.**

| <i>RNAs parameters for siRNA</i>     |                   | <i>Blast parameters for siRNA</i> |                   |
|--------------------------------------|-------------------|-----------------------------------|-------------------|
| <i>Parameter</i>                     | <i>Adjustment</i> | <i>Parameter</i>                  | <i>Adjustment</i> |
| <i>Window size</i>                   | 80                | <i>Word size</i>                  | 11                |
| <i>16-nt accessibility threshold</i> | 0.001002          | <i>Expect threshold</i>           | 10                |
| <i>8-nt accessibility threshold</i>  | 0.01157           | <i>Mismatch penalty</i>           | 3                 |
| <i>Maximum base-pair distance</i>    | 140               | <i>Gap open penalty</i>           | 5                 |
| <i>Gap extension penalty</i>         | 2                 | <i>Gap extension penalty</i>      | 2                 |

The default blast running parameters are inappropriate to performing siRNA off-target dataset search due to their small length, therefore they needed to be modified. RNAs parameters capable of performing target accessibility evaluation for siRNA-mRNA.
