# Supplementary material for: MysiRNA-Designer: A Workflow for Efficient siRNA Design
Source: PubMed Central journal article supplement (PMC3202522; doi:10.1371/journal.pone.0025642), 2011-10-26
Supplement: pone.0025642.s004.pdf [file pone.0025642.s004.pdf]

**Dated illustration of the Comparative analysis results between *MysiRNA-Designer*, *AsiDesigner*, *siDesign* and *RNAXs* against an experimentally verified dataset.**

|             | Asi-designer | siDesign | RNAXs | MysiRNA | MysiRNA 93% |             | Asi-designer | siDesign | RNAXs | MysiRNA | MysiRNA 93% |
|-------------|--------------|----------|-------|---------|-------------|-------------|--------------|----------|-------|---------|-------------|
|             | <b>Bcl2</b>  |          |       |         |             |             | <b>MYC</b>   |          |       |         |             |
| TP          | 3            | 4        | 8     | 3       | 3           | TP          | 3            | 3        | 12    | 2       | 1           |
| FN          | 16           | 15       | 11    | 16      | 16          | FN          | 19           | 19       | 10    | 20      | 21          |
| TN          | 1852         | 1839     | 1571  | 1870    | 1885        | TN          | 2248         | 2232     | 1856  | 2272    | 2299        |
| FP          | 66           | 79       | 347   | 48      | 33          | FP          | 80           | 96       | 472   | 56      | 29          |
| Sensitivity | 0.16         | 0.21     | 0.42  | 0.16    | 0.16        | Sensitivity | 0.14         | 0.14     | 0.55  | 0.09    | 0.05        |
| Specificity | 0.97         | 0.96     | 0.82  | 0.97    | 0.98        | Specificity | 0.97         | 0.96     | 0.80  | 0.98    | 0.99        |
|             | <b>Hras1</b> |          |       |         |             |             | <b>Pcna</b>  |          |       |         |             |
| TP          | 2            | 0        | 3     | 1       | 1           | TP          | 3            | 7        | 13    | 8       | 6           |
| FN          | 3            | 5        | 2     | 4       | 4           | FN          | 20           | 16       | 10    | 15      | 17          |
| TN          | 491          | 466      | 426   | 506     | 512         | TN          | 1111         | 1116     | 897   | 1142    | 1154        |
| FP          | 25           | 50       | 90    | 10      | 4           | FP          | 77           | 72       | 291   | 46      | 34          |
| Sensitivity | 0.40         | 0.00     | 0.60  | 0.20    | 0.20        | Sensitivity | 0.13         | 0.30     | 0.57  | 0.35    | 0.26        |
| Specificity | 0.95         | 0.90     | 0.83  | 0.98    | 0.99        | Specificity | 0.94         | 0.94     | 0.76  | 0.96    | 0.97        |
|             | <b>Kras</b>  |          |       |         |             |             | <b>Rpa3</b>  |          |       |         |             |
| TP          | 9            | 11       | 37    | 16      | 13          | TP          | 0            | 1        | 2     | 0       | 0           |
| FN          | 83           | 81       | 55    | 76      | 79          | FN          | 3            | 2        | 1     | 3       | 3           |
| TN          | 4306         | 4264     | 2975  | 4293    | 4383        | TN          | 531          | 520      | 379   | 521     | 534         |
| FP          | 215          | 257      | 1546  | 228     | 138         | FP          | 26           | 37       | 178   | 36      | 23          |
| Sensitivity | 0.10         | 0.12     | 0.40  | 0.17    | 0.14        | Sensitivity | 0.00         | 0.33     | 0.67  | 0.00    | 0.00        |
| Specificity | 0.95         | 0.94     | 0.66  | 0.95    | 0.97        | Specificity | 0.95         | 0.93     | 0.68  | 0.94    | 0.96        |
|             | <b>Mcl1</b>  |          |       |         |             |             | <b>Trp53</b> |          |       |         |             |
| TP          | 6            | 5        | 29    | 12      | 7           | TP          | 1            | 1        | 3     | 1       | 1           |
| FN          | 40           | 41       | 17    | 34      | 39          | FN          | 3            | 3        | 1     | 3       | 3           |
| TN          | 3246         | 3219     | 2661  | 3287    | 3328        | TN          | 1661         | 1679     | 1422  | 1697    | 1719        |
| FP          | 157          | 184      | 742   | 116     | 75          | FP          | 68           | 50       | 307   | 32      | 10          |
| Sensitivity | 0.13         | 0.11     | 0.63  | 0.26    | 0.15        | Sensitivity | 0.25         | 0.25     | 0.75  | 0.25    | 0.25        |
| Specificity | 0.95         | 0.95     | 0.78  | 0.97    | 0.98        | Specificity | 0.96         | 0.97     | 0.82  | 0.98    | 0.99        |
|             | <b>Hmyc</b>  |          |       |         |             |             | <b>Total</b> |          |       |         |             |
| TP          | 4            | 10       | 10    | 1       | 1           | TP          | 31           | 42       | 117   | 44      | 33          |
| FN          | 14           | 8        | 8     | 17      | 17          | FN          | 201          | 190      | 115   | 188     | 199         |
| TN          | 2211         | 2074     | 1881  | 2255    | 2276        | TN          | 17657        | 17409    | 14068 | 17843   | 18090       |
| FP          | 99           | 236      | 429   | 55      | 34          | FP          | 813          | 1061     | 4402  | 627     | 380         |
| Sensitivity | 0.22         | 0.56     | 0.56  | 0.06    | 0.06        | Sensitivity | 0.13         | 0.18     | 0.50  | 0.19    | 0.14        |
| Specificity | 0.96         | 0.90     | 0.81  | 0.98    | 0.99        | Specificity | 0.95         | 0.94     | 0.76  | 0.97    | 0.98        |
